# Supplementary material
Source: publisher site journal article supplement (https://www.dovepress.com/article/244928)
Supplement: Supplementary file 1 [file get_supplementary_file.php]

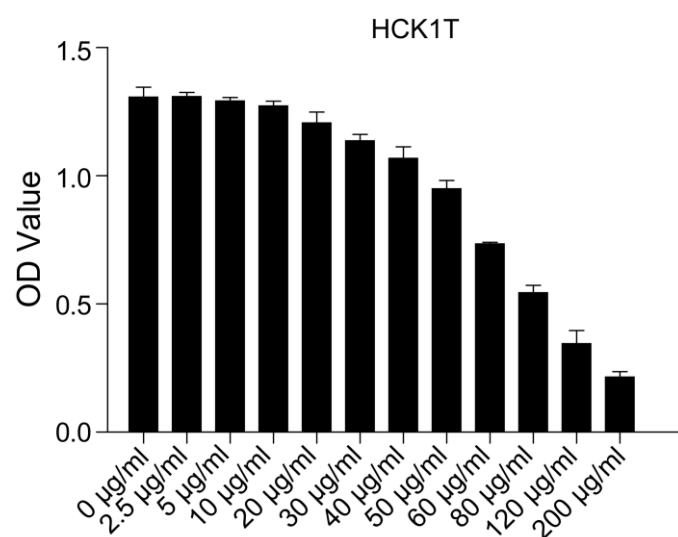

**Supplementary figure 1.** Butorphanol inhibits the viability of normal cervical cells.

**Notes:** HCK1T cells were treated with different concentrations of Butorphanol for 24 h, and CCK8 assay was performed to examine cell viability.
